# Supplementary material for: Structures of wild-type and a constitutively closed mutant of connexin26 shed light on channel regulation by CO2
Source: eLife. 2024 Jun 3;13:RP93686. doi: 10.7554/eLife.93686 (PMC11147507; doi:10.7554/eLife.93686)
Supplement: Figure 4—source data 1. [file elife-93686-fig4-data1.xlsx]

## Sheet: Cx26-WT
	Donor cell							Acceptor cell
Mins	1	2	3	4	5	6	7	1	2	3	4	5	6	7
0	241.501	301.075	214.685	257.505	271.487	252.459	201.977	194.435	195.521	199.444	216.331	195.278	199.075	188.681
1	618.564	1539.36	2475.64	938.549	2143.31	729.514	407.712	423.552	706.257	2229.29	597.491	1500.09	515.696	511.605
2	1072.21	2165.64	3947.4	1135.53	3409.73	954.77	564.371	792.49	1298.19	4085.93	863.282	2540.85	685.414	768.557
3	1389.54	2600.72	4738.56	1095.11	4017.79	1109.65	655.546	1046.76	1676.24	5117.7	918.52	3108.44	790.893	937.462
4	1709.76	2950.34	5182.92	1099.18	4247.71	1205.31	706.545	1288.05	1909.08	5707.98	960.031	3367.66	866.307	1007.16
5	1889.18	3121.16	5453.88	1120.14	4448.45	1258.02	829.514	1422.87	2069.56	6023.38	1015.48	3450.67	902.591	1186.43
6	2029.03	3255.59	5584.01	1114.7	4461.36	1262.78	889.138	1512.01	2193.96	6165.59	1036.45	3486.21	921.346	1315.1
7	2126.49	3357.57	5670.87	1099.56	4550.99	1289.21	922.315	1573.44	2284.9	6227.37	1045.34	3517.43	934.88	1373.3
8	2178.68	3437.01	5717.36	1041.5	4625.59	1314	940.42	1611.32	2347.81	6217.63	1025.22	3496.57	951.869	1393.23
9	2284.05	3533.4	5736.63	707.508	4862.54	1332.75	955.518	1644.66	2405.76	6241.95	764.132	3452.22	973.514	1406.78
10	2722.98	3541.37	5774.72	654.135	4844.91	1384.43	957.843	1886.22	2442.67	6258.51	612.95	3464.95	1009.84	1408.38

## Sheet: Cx26 K125E, low CO2
	Donor cell							Acceptor cell
Mins	1	2	3	4	5	6	7	1	2	3	4	5	6	7
0	251.082	347.007	2643.68	215.442	216.662	241.406	396.848	198.242	205.521	201.344	190.627	190.488	206.378	195.041
1	1421.98	4686.98	3633.89	742.407	1447.93	1463.6	3306.78	203.517	246.583	201.882	195.32	198.624	209.025	220.612
2	2120.12	6446.29	4329.79	1262.73	2418.24	2470.61	4759.96	211.876	295.322	202.337	205.961	204.594	213.556	249.676
3	2414.95	7012.33	4790.38	1593.28	2956.3	3179.59	5384.54	219.213	326.784	203.191	219.11	209.323	218.533	264.896
4	2456.38	7276.6	5189.68	1812.16	3423.01	3639.8	5633.47	226.331	350.867	203.928	231.936	212.237	221.229	271.673
5	2359.8	7388.65	5311.99	1924.64	3802.37	3925.92	5853.88	230.074	360.93	204.847	242.045	216.226	223.435	272.739
6	2250.03	7422.89	5398.34	2015.25	3702.91	4125.31	6040.39	231.925	364.894	204.354	251.472	214.785	223.711	271.045
7	2079.51	7325.1	5424.85	2065.38	3588.18	4250.73	6117.92	232.522	362.171	204.067	258.255	213.361	223.801	266.778
8	1982.32	7298.23	2123.51	2083.19	3462.81	4244.85	6285.11	232.809	355.964	201.405	264.159	212.718	223.713	262.155
9	1868.09	7341.63	514.688	2084.22	3319.79	4253.57	6426.6	232.572	347.007	194.069	268.688	211.084	222.721	256.351
10	1750.36	7380.59	458.51	2056.89	3303.44	4325.53	6519.24	230.774	334.454	193.281	271.275	210.706	222.074	252.448

## Sheet: Cx26 K125E High CO2
	Donor cell						Acceptor cell
Mins	1	2	3	4	5	6	1	2	3	4	5	6
0	1874.46	239.851	307.121	244.042	2415.32	245.87	246.374	189.12	201.455	199.742	210.764	199.031
1	1836.57	846.681	3048.78	1448.95	3726.86	1134.08	251.76	195.572	250.072	211.099	233.944	263.871
2	1866.33	1578.18	4778.33	2369.89	4437.1	1498.84	256.437	204.518	289.205	227.583	246.506	302.907
3	1865.66	2028.17	5470.67	2976.63	4585.91	1640.67	259.909	210.513	310.976	238.481	252.777	321.755
4	1849.2	2353.24	5784.16	3225.71	4309.83	1713.85	262.157	214.72	318.926	244.1	262.718	329.564
5	1834.83	2428.34	6140.1	3377.65	4692.19	1790.36	264.819	216.007	326.378	248.533	259.966	338.99
6	1780.18	2403.94	6339.7	3538.28	4877.62	1975.12	263.95	217.958	330.403	250.383	259.749	357.419
7	1721.3	2404.93	6457.12	3541.44	5059.65	1829.88	262.08	218.369	327.922	249.838	255.702	349.202
8	1676.45	2345.88	6464.27	3526.18	4971.77	1732.48	261.069	219.341	327.466	249.588	257.343	342.061
9	1672.62	2261.96	6297.86	3567.59	5167.29	1703.07	260.193	219.353	325.052	248.559	251.72	334.379
10	1625.73	2170.95	6198.86	3474.52	5095.82	1705.22	257.388	218.374	320.157	247.313	250.054	334.182
